# Supplementary material for: Designing Optimal Breakfast for the United States Using Linear Programming and the NHANES 2011–2014 Database: A Study from the International Breakfast Research Initiative (IBRI)
Source: PubMed Central journal article supplement (PMC6627424; doi:10.3390/nu11061374), 2019-06-19
Supplement: nutrients-11-01374-s001.pdf [file nutrients-11-01374-s001.pdf]

**Table S1.** Quantity consumed (grams) and contribution (%) of WWEIA food categories to MyPlate food groups in Adults observed diets.

|                  |                          | OBS<br>quantity | Other<br>Fruit | Citrus<br>Fruit | Juice | Whole<br>grains | Ref<br>grains | Soy,<br>nuts | Eggs  | Meat  | Cheese | Yogurt | Milk  |
|------------------|--------------------------|-----------------|----------------|-----------------|-------|-----------------|---------------|--------------|-------|-------|--------|--------|-------|
| Beverages        | Coffee & Tea             | 231.4           | 0.00           | 0.00            | 0.00  | 0.01            | 0.00          | 0.00         | 0.00  | 0.00  | 0.00   | 0.00   | 10.78 |
|                  | Diet Beverages           | 12.4            | 0.00           | 0.00            | 0.04  | 0.00            | 0.00          | 0.00         | 0.00  | 0.00  | 0.00   | 0.00   | 0.00  |
|                  | Sweetened<br>Beverages   | 75.5            | 22.11          | 42.47           | 23.26 | 0.12            | 0.07          | 2.69         | 0.00  | 0.00  | 0.00   | 19.62  | 5.56  |
| Fats & Oils      | Fats & Oils              | 9.1             | 0.00           | 0.00            | 0.00  | 0.00            | 0.00          | 0.00         | 0.08  | 0.00  | 0.01   | 0.04   | 1.97  |
| Fruit            | Fruit                    | 9.3             | 62.66          | 45.23           | 0.07  | 0.00            | 0.00          | 0.00         | 0.00  | 0.00  | 0.00   | 0.00   | 0.00  |
|                  | 100% Juice               | 15.8            | 0.00           | 0.00            | 74.99 | 0.00            | 0.00          | 0.00         | 0.00  | 0.00  | 0.00   | 0.00   | 0.00  |
| Grains           | Breads                   | 16.2            | 1.65           | 0.00            | 0.00  | 49.29           | 32.30         | 1.49         | 0.00  | 0.00  | 0.21   | 0.01   | 0.20  |
|                  | Cooked grains            | 8.4             | 0.05           | 0.00            | 0.00  | 13.51           | 0.56          | 0.01         | 0.01  | 0.00  | 0.29   | 0.00   | 2.80  |
|                  | Grains                   | 1.3             | 0.28           | 0.34            | 0.00  | 1.40            | 0.70          | 0.00         | 0.01  | 0.00  | 0.00   | 0.00   | 0.01  |
|                  | Quick Breads             | 11.6            | 0.44           | 4.42            | 0.04  | 3.95            | 17.23         | 1.36         | 5.68  | 0.00  | 0.04   | 0.00   | 4.76  |
|                  | High Sugar<br>RTE Cereal | 3.3             | 3.52           | 0.10            | 0.00  | 12.98           | 1.90          | 2.46         | 0.00  | 0.00  | 0.00   | 0.00   | 0.15  |
|                  | Low Sugar<br>RTE Cereal  | 1.7             | 0.12           | 0.00            | 0.00  | 10.43           | 1.05          | 2.00         | 0.00  | 0.00  | 0.00   | 0.00   | 0.00  |
|                  |                          |                 |                |                 |       |                 |               |              |       |       |        |        |       |
| Milk &<br>Dairy  | Cheese                   | 2.2             | 0.02           | 0.00            | 0.00  | 0.00            | 0.02          | 0.00         | 0.00  | 0.00  | 41.11  | 0.00   | 0.00  |
|                  | Flavored Milk            | 4.5             | 0.00           | 0.00            | 0.00  | 0.00            | 0.00          | 0.00         | 0.00  | 0.00  | 0.00   | 0.00   | 6.20  |
|                  | Milk                     | 32.8            | 0.00           | 0.00            | 0.00  | 0.00            | 0.00          | 0.00         | 0.00  | 0.00  | 0.00   | 0.00   | 55.56 |
|                  | Milk Dessert<br>Drinks   | 0.6             | 0.00           | 0.00            | 0.00  | 0.00            | 0.00          | 0.25         | 0.00  | 0.00  | 0.00   | 0.00   | 0.45  |
|                  | Yogurt                   | 4.5             | 0.51           | 2.43            | 0.00  | 0.00            | 0.00          | 0.00         | 0.00  | 0.00  | 0.00   | 76.75  | 0.00  |
| Mixed<br>Dishes  | Mixed Dishes             | 33.7            | 0.20           | 0.01            | 0.06  | 1.66            | 24.08         | 17.26        | 13.18 | 23.80 | 46.55  | 0.04   | 3.41  |
| Protein<br>Foods | Eggs                     | 21.7            | 0.00           | 0.00            | 0.00  | 0.00            | 0.07          | 0.00         | 77.82 | 4.84  | 11.04  | 0.00   | 4.50  |
|                  | Nuts, Beans & Soy        | 1.8             | 0.24           | 0.00            | 0.00  | 0.23            | 0.01          | 55.94        | 0.02  | 0.03  | 0.00   | 0.00   | 0.00  |
|                  | Processed Meat           | 9.1             | 0.00           | 0.00            | 0.00  | 0.00            | 0.00          | 0.01         | 0.00  | 46.42 | 0.03   | 0.00   | 0.00  |
|                  | Seafood/Meat             | 4.9             | 0.00           | 0.00            | 0.00  | 0.01            | 1.01          | 0.20         | 0.41  | 24.87 | 0.00   | 0.00   | 0.07  |
|                  | Candy                    | 0.3             | 0.09           | 0.00            | 0.00  | 0.00            | 0.01          | 3.18         | 0.00  | 0.00  | 0.00   | 0.00   | 0.10  |

|                    |                            |      |      |      |      |      |       |      |      |      |      |      |      |
|--------------------|----------------------------|------|------|------|------|------|-------|------|------|------|------|------|------|
|                    | Crackers                   | 0.4  | 0.00 | 0.00 | 0.00 | 0.69 | 1.09  | 0.80 | 0.00 | 0.00 | 0.03 | 0.00 | 0.00 |
| Snacks &<br>Sweets | Other Desserts             | 1.0  | 0.11 | 0.00 | 0.02 | 0.00 | 0.02  | 0.09 | 0.01 | 0.00 | 0.01 | 3.51 | 0.78 |
|                    | Savory Snacks              | 0.7  | 0.00 | 0.00 | 0.00 | 1.66 | 1.29  | 0.09 | 0.00 | 0.00 | 0.09 | 0.00 | 0.00 |
|                    | Snack/Meal Bars            | 1.0  | 0.30 | 0.08 | 0.00 | 2.77 | 0.36  | 7.38 | 0.00 | 0.00 | 0.00 | 0.03 | 0.12 |
|                    | Sweet Bakery               | 12.8 | 6.55 | 0.79 | 0.01 | 1.29 | 18.22 | 4.35 | 2.61 | 0.00 | 0.07 | 0.00 | 2.34 |
| Sugars             | Sugars                     | 8.6  | 1.15 | 4.12 | 1.51 | 0.00 | 0.00  | 0.41 | 0.00 | 0.00 | 0.00 | 0.00 | 0.10 |
| Vegetables         | Vegetables, Non-<br>potato | 2.2  | 0.00 | 0.00 | 0.00 | 0.00 | 0.01  | 0.02 | 0.01 | 0.00 | 0.09 | 0.01 | 0.01 |
|                    | White Potatoes             | 8.7  | 0.00 | 0.00 | 0.00 | 0.00 | 0.01  | 0.00 | 0.15 | 0.04 | 0.44 | 0.00 | 0.14 |

**Table S2:** Optimized quantity (grams) and contribution (%) of WWEIA food categories to MyPlate food groups in Adults optimized diets (relative function)

|               |                       | OPT<br>quantity | Other<br>Fruit | Citrus<br>Fruit | Juice | Whole<br>grains | Ref<br>grains | Soy,<br>nuts | Eggs  | Meat  | Cheese | Yogurt | Milk  |
|---------------|-----------------------|-----------------|----------------|-----------------|-------|-----------------|---------------|--------------|-------|-------|--------|--------|-------|
| Beverages     | Coffee & Tea          | 231.4           | 0.00           | 0.00            | 0.00  | 0.01            | 0.00          | 0.00         | 0.00  | 0.00  | 0.00   | 0.00   | 2.59  |
|               | Diet Beverages        | 12.4            | 0.00           | 0.00            | 0.04  | 0.00            | 0.00          | 0.00         | 0.00  | 0.00  | 0.00   | 0.00   | 0.00  |
|               | Sweetened Beverages   | 75.5            | 3.30           | 8.55            | 23.14 | 0.07            | 0.12          | 2.91         | 0.00  | 0.00  | 0.00   | 19.63  | 1.34  |
| Fats & Oils   | Fats & Oils           | 9.1             | 0.00           | 0.00            | 0.00  | 0.00            | 0.00          | 0.00         | 6.17  | 0.00  | 0.01   | 0.04   | 0.47  |
| Fruit         | Fruit                 | 92.1            | 92.21          | 89.88           | 0.70  | 0.00            | 0.00          | 0.00         | 0.00  | 0.00  | 0.00   | 0.00   | 0.00  |
|               | 100% Juice            | 15.8            | 0.00           | 0.00            | 74.60 | 0.00            | 0.00          | 0.00         | 0.00  | 0.00  | 0.00   | 0.00   | 0.00  |
| Grains        | Breads                | 16.2            | 0.25           | 0.00            | 0.00  | 28.98           | 58.51         | 1.61         | 0.38  | 0.00  | 0.50   | 0.01   | 0.05  |
|               | Cooked grains         | 8.4             | 0.01           | 0.00            | 0.00  | 7.94            | 1.01          | 0.01         | 1.14  | 0.00  | 0.68   | 0.00   | 0.67  |
|               | Grains                | 1.3             | 0.04           | 0.07            | 0.00  | 0.82            | 1.27          | 0.00         | 0.62  | 0.00  | 0.00   | 0.00   | 0.00  |
|               | Quick Breads          | 0               | 0.00           | 0.00            | 0.00  | 0.00            | 0.00          | 0.00         | 0.00  | 0.00  | 0.00   | 0.00   | 0.00  |
|               | High Sugar RTE Cereal | 22.9            | 3.63           | 0.14            | 0.00  | 52.75           | 23.76         | 18.37        | 0.00  | 0.00  | 0.00   | 0.00   | 0.25  |
|               | Low Sugar RTE Cereal  | 1.7             | 0.02           | 0.00            | 0.00  | 6.13            | 1.90          | 2.16         | 0.00  | 0.00  | 0.00   | 0.00   | 0.00  |
|               | Cheese                | 2.2             | 0.00           | 0.00            | 0.00  | 0.00            | 0.03          | 0.00         | 0.00  | 0.00  | 97.22  | 0.00   | 0.00  |
| Milk & Dairy  | Flavored Milk         | 4.5             | 0.00           | 0.00            | 0.00  | 0.00            | 0.00          | 0.00         | 0.00  | 0.00  | 0.00   | 0.00   | 1.49  |
|               | Milk                  | 227.6           | 0.00           | 0.00            | 0.00  | 0.00            | 0.00          | 0.00         | 0.00  | 0.00  | 0.00   | 0.00   | 92.61 |
|               | Milk Dessert Drinks   | 0.6             | 0.00           | 0.00            | 0.00  | 0.00            | 0.00          | 0.27         | 0.03  | 0.00  | 0.00   | 0.00   | 0.11  |
|               | Yogurt                | 4.5             | 0.08           | 0.49            | 0.00  | 0.00            | 0.00          | 0.00         | 0.00  | 0.00  | 0.00   | 76.78  | 0.00  |
| Mixed Dishes  | Mixed Dishes          | 0               | 0.00           | 0.00            | 0.00  | 0.00            | 0.00          | 0.00         | 0.00  | 0.00  | 0.00   | 0.00   | 0.00  |
| Protein Foods | Eggs                  | 0               | 0.00           | 0.00            | 0.00  | 0.00            | 0.00          | 0.00         | 0.00  | 0.00  | 0.00   | 0.00   | 0.00  |
|               | Nuts, Beans & Soy     | 1.8             | 0.04           | 0.00            | 0.00  | 0.14            | 0.01          | 60.55        | 1.91  | 0.12  | 0.01   | 0.00   | 0.00  |
|               | Processed Meat        | 0               | 0.00           | 0.00            | 0.00  | 0.00            | 0.00          | 0.00         | 0.00  | 0.00  | 0.00   | 0.00   | 0.00  |
|               | Seafood/Meat          | 4.9             | 0.00           | 0.00            | 0.00  | 0.00            | 1.84          | 0.22         | 33.48 | 99.72 | 0.00   | 0.00   | 0.02  |

|            |                        |     |      |      |      |      |      |      |       |      |      |      |      |
|------------|------------------------|-----|------|------|------|------|------|------|-------|------|------|------|------|
|            | Candy                  | 0.3 | 0.01 | 0.00 | 0.00 | 0.00 | 0.02 | 3.45 | 0.04  | 0.00 | 0.00 | 0.00 | 0.02 |
|            | Crackers               | 0.4 | 0.00 | 0.00 | 0.00 | 0.41 | 1.97 | 0.87 | 0.00  | 0.00 | 0.07 | 0.00 | 0.00 |
| Snacks &   | Other Desserts         | 1.0 | 0.02 | 0.00 | 0.02 | 0.00 | 0.04 | 0.10 | 1.04  | 0.00 | 0.03 | 3.51 | 0.19 |
| Sweets     | Savory Snacks          | 0.7 | 0.00 | 0.00 | 0.00 | 0.97 | 2.33 | 0.10 | 0.00  | 0.00 | 0.21 | 0.00 | 0.00 |
|            | Snack/Meal Bars        | 1.0 | 0.05 | 0.02 | 0.00 | 1.63 | 0.65 | 7.99 | 0.16  | 0.00 | 0.00 | 0.03 | 0.03 |
|            | Sweet Bakery           | 2.5 | 0.19 | 0.03 | 0.00 | 0.15 | 6.49 | 0.93 | 41.93 | 0.00 | 0.03 | 0.00 | 0.11 |
| Sugars     | Sugars                 | 8.6 | 0.17 | 0.83 | 1.50 | 0.00 | 0.00 | 0.45 | 0.00  | 0.00 | 0.00 | 0.00 | 0.02 |
| Vegetables | Vegetables, Non-potato | 2.2 | 0.00 | 0.00 | 0.00 | 0.00 | 0.02 | 0.02 | 0.88  | 0.00 | 0.21 | 0.01 | 0.00 |
|            | White Potatoes         | 8.7 | 0.00 | 0.00 | 0.00 | 0.00 | 0.03 | 0.00 | 12.21 | 0.16 | 1.03 | 0.00 | 0.03 |

**Table S3:** Optimized quantity (grams) and contribution (%) of WWEIA food categories to MyPlate food groups in Adults optimized diets (absolute function)

|               |                       | OPT<br>quantity | Other<br>Fruit | Citrus<br>Fruit | Juice | Whole<br>grains | Ref<br>grains | Soy,<br>nuts | Eggs  | Meat  | Cheese | Yogurt | Milk  |
|---------------|-----------------------|-----------------|----------------|-----------------|-------|-----------------|---------------|--------------|-------|-------|--------|--------|-------|
| Beverages     | Coffee & Tea          | 231.4           | 0.00           | 0.00            | 0.00  | 0.00            | 0.00          | 0.00         | 0.00  | 0.00  | 0.00   | 0.00   | 2.84  |
|               | Diet Beverages        | 12.4            | 0.00           | 0.00            | 0.04  | 0.00            | 0.00          | 0.00         | 0.00  | 0.00  | 0.00   | 0.00   | 0.00  |
|               | Sweetened Beverages   | 75.5            | 4.03           | 10.04           | 23.17 | 0.06            | 0.24          | 2.51         | 0.00  | 0.00  | 0.00   | 19.63  | 1.47  |
| Fats & Oils   | Fats & Oils           | 9.1             | 0.00           | 0.00            | 0.00  | 0.00            | 0.00          | 0.00         | 0.10  | 0.00  | 0.04   | 0.04   | 0.52  |
| Fruit         | Fruit                 | 77.1            | 94.21          | 88.25           | 0.59  | 0.00            | 0.00          | 0.00         | 0.00  | 0.00  | 0.00   | 0.00   | 0.00  |
|               | 100% Juice            | 15.8            | 0.00           | 0.00            | 74.68 | 0.00            | 0.00          | 0.00         | 0.00  | 0.00  | 0.00   | 0.00   | 0.00  |
| Grains        | Breads                | 0               | 0.00           | 0.00            | 0.00  | 0.00            | 0.00          | 0.00         | 0.00  | 0.00  | 0.00   | 0.00   | 0.00  |
|               | Cooked grains         | 8.4             | 0.01           | 0.00            | 0.00  | 6.49            | 2.01          | 0.01         | 0.02  | 0.00  | 2.40   | 0.00   | 0.74  |
|               | Grains                | 1.3             | 0.05           | 0.08            | 0.00  | 0.67            | 2.52          | 0.00         | 0.01  | 0.00  | 0.00   | 0.00   | 0.00  |
|               | Quick Breads          | 0               | 0.00           | 0.00            | 0.00  | 0.00            | 0.00          | 0.00         | 0.00  | 0.00  | 0.00   | 0.00   | 0.00  |
|               | High Sugar RTE Cereal | 3.3             | 0.64           | 0.02            | 0.00  | 6.23            | 6.83          | 2.29         | 0.00  | 0.00  | 0.00   | 0.00   | 0.04  |
|               | Low Sugar RTE Cereal  | 27.9            | 0.36           | 0.00            | 0.00  | 84.16           | 63.34         | 31.29        | 0.00  | 0.00  | 0.00   | 0.00   | 0.00  |
|               | Cheese                | 0               | 0.00           | 0.00            | 0.00  | 0.00            | 0.00          | 0.00         | 0.00  | 0.00  | 0.00   | 0.00   | 0.00  |
| Milk & Dairy  | Flavored Milk         | 4.5             | 0.00           | 0.00            | 0.00  | 0.00            | 0.00          | 0.00         | 0.00  | 0.00  | 0.00   | 0.00   | 1.64  |
|               | Milk                  | 203.6           | 0.00           | 0.00            | 0.00  | 0.00            | 0.00          | 0.00         | 0.00  | 0.00  | 0.00   | 0.00   | 90.96 |
|               | Milk Dessert Drinks   | 0.6             | 0.00           | 0.00            | 0.00  | 0.00            | 0.01          | 0.23         | 0.00  | 0.00  | 0.00   | 0.00   | 0.12  |
|               | Yogurt                | 4.5             | 0.09           | 0.57            | 0.00  | 0.00            | 0.00          | 0.00         | 0.00  | 0.00  | 0.00   | 76.79  | 0.00  |
| Mixed Dishes  | Mixed Dishes          | 0               | 0.00           | 0.00            | 0.00  | 0.00            | 0.00          | 0.00         | 0.00  | 0.00  | 0.00   | 0.00   | 0.00  |
| Protein Foods | Eggs                  | 21.7            | 0.00           | 0.00            | 0.00  | 0.00            | 0.26          | 0.00         | 98.35 | 16.26 | 92.17  | 0.00   | 1.19  |
|               | Nuts, Beans & Soy     | 1.8             | 0.04           | 0.00            | 0.00  | 0.11            | 0.03          | 52.14        | 0.03  | 0.10  | 0.04   | 0.00   | 0.00  |
|               | Processed Meat        | 0               | 0.00           | 0.00            | 0.00  | 0.00            | 0.00          | 0.00         | 0.00  | 0.00  | 0.00   | 0.00   | 0.00  |
|               | Seafood/Meat          | 4.9             | 0.00           | 0.00            | 0.00  | 0.00            | 3.65          | 0.19         | 0.52  | 83.51 | 0.00   | 0.00   | 0.02  |

|                    |                            |     |      |      |      |      |       |      |      |      |      |      |      |
|--------------------|----------------------------|-----|------|------|------|------|-------|------|------|------|------|------|------|
|                    | Candy                      | 0.3 | 0.02 | 0.00 | 0.00 | 0.00 | 0.04  | 2.97 | 0.00 | 0.00 | 0.00 | 0.00 | 0.03 |
|                    | Crackers                   | 0   | 0.00 | 0.00 | 0.00 | 0.00 | 0.00  | 0.00 | 0.00 | 0.00 | 0.00 | 0.00 | 0.00 |
| Snacks &<br>Sweets | Other Desserts             | 1.0 | 0.02 | 0.00 | 0.02 | 0.00 | 0.08  | 0.09 | 0.02 | 0.00 | 0.11 | 3.51 | 0.20 |
|                    | Savory Snacks              | 0.7 | 0.00 | 0.00 | 0.00 | 0.80 | 4.63  | 0.09 | 0.00 | 0.00 | 0.72 | 0.00 | 0.00 |
|                    | Snack/Meal Bars            | 1.0 | 0.06 | 0.02 | 0.00 | 1.33 | 1.30  | 6.88 | 0.00 | 0.00 | 0.00 | 0.03 | 0.03 |
|                    | Sweet Bakery               | 2.9 | 0.27 | 0.04 | 0.00 | 0.14 | 14.98 | 0.93 | 0.75 | 0.00 | 0.13 | 0.00 | 0.14 |
| Sugars             | Sugars                     | 8.6 | 0.21 | 0.97 | 1.50 | 0.00 | 0.00  | 0.38 | 0.00 | 0.00 | 0.00 | 0.00 | 0.03 |
| Vegetables         | Vegetables, Non-<br>potato | 2.2 | 0.00 | 0.00 | 0.00 | 0.00 | 0.03  | 0.02 | 0.01 | 0.00 | 0.73 | 0.01 | 0.00 |
|                    | White Potatoes             | 8.7 | 0.00 | 0.00 | 0.00 | 0.00 | 0.05  | 0.00 | 0.19 | 0.13 | 3.65 | 0.00 | 0.04 |

**Table S4:** Quantity consumed (grams) and contribution (%) of WWEIA food categories to MyPlate food groups in children observed diets

|                    |                          | OBS<br>quantity | Other<br>Fruit | Citrus<br>Fruit | Juice | Whole<br>grains | Ref<br>grains | Soy,<br>nuts | Eggs  | Meat  | Cheese | Yogurt | Milk  |
|--------------------|--------------------------|-----------------|----------------|-----------------|-------|-----------------|---------------|--------------|-------|-------|--------|--------|-------|
| Beverages          | Coffee & Tea             | 24.3            | 0.00           | 0.00            | 0.00  | 0.00            | 0.00          | 0.02         | 0.00  | 0.00  | 0.00   | 0.00   | 1.70  |
|                    | Diet Beverages           | 2.6             | 0.00           | 0.00            | 0.00  | 0.00            | 0.00          | 0.00         | 0.00  | 0.00  | 0.00   | 0.00   | 0.00  |
|                    | Sweetened Beverages      | 55.9            | 13.38          | 38.38           | 14.35 | 0.00            | 0.03          | 1.19         | 0.00  | 0.00  | 0.00   | 29.16  | 1.25  |
| Fats & Oils        | Fats & Oils              | 1.7             | 0.00           | 0.00            | 0.00  | 0.00            | 0.00          | 0.00         | 0.05  | 0.00  | 0.00   | 0.01   | 0.01  |
| Fruit              | Fruit                    | 8.9             | 69.84          | 48.62           | 0.29  | 0.00            | 0.00          | 0.00         | 0.00  | 0.00  | 0.00   | 0.00   | 0.00  |
|                    | 100% Juice               | 19.5            | 0.00           | 0.00            | 84.44 | 0.00            | 0.00          | 0.00         | 0.00  | 0.00  | 0.00   | 0.00   | 0.00  |
| Grains             | Breads                   | 7.3             | 0.61           | 0.00            | 0.00  | 26.85           | 13.58         | 1.62         | 0.03  | 0.00  | 0.17   | 0.00   | 0.09  |
|                    | Cooked grains            | 6.9             | 0.00           | 0.00            | 0.00  | 13.63           | 0.49          | 0.00         | 0.09  | 0.00  | 2.06   | 0.00   | 1.73  |
|                    | Grains                   | 0.9             | 0.00           | 0.00            | 0.00  | 0.03            | 0.64          | 0.50         | 0.03  | 0.00  | 0.00   | 0.00   | 0.00  |
|                    | Quick Breads             | 20.0            | 0.09           | 9.33            | 0.10  | 10.82           | 26.05         | 0.95         | 17.47 | 0.00  | 0.00   | 0.00   | 4.88  |
|                    | High Sugar<br>RTE Cereal | 6.4             | 1.76           | 0.05            | 0.00  | 28.31           | 3.88          | 4.65         | 0.00  | 0.00  | 0.00   | 0.00   | 0.07  |
|                    | Low Sugar<br>RTE Cereal  | 0.8             | 0.00           | 0.00            | 0.00  | 6.22            | 0.61          | 0.72         | 0.00  | 0.00  | 0.00   | 0.00   | 0.00  |
|                    |                          |                 |                |                 |       |                 |               |              |       |       |        |        |       |
| Milk & Dairy       | Cheese                   | 0.8             | 0.00           | 0.00            | 0.00  | 0.00            | 0.00          | 0.00         | 0.00  | 0.00  | 25.64  | 0.00   | 0.00  |
|                    | Flavored Milk            | 9.7             | 0.00           | 0.00            | 0.00  | 0.00            | 0.00          | 0.00         | 0.00  | 0.00  | 0.00   | 0.00   | 8.92  |
|                    | Milk                     | 75.1            | 0.00           | 0.00            | 0.00  | 0.00            | 0.00          | 0.00         | 0.00  | 0.00  | 0.00   | 0.00   | 73.98 |
|                    | Milk Dessert Drinks      | 0.8             | 0.00           | 0.00            | 0.00  | 0.00            | 0.00          | 0.55         | 0.01  | 0.00  | 0.00   | 0.00   | 0.45  |
|                    | Yogurt                   | 2.7             | 0.50           | 1.68            | 0.00  | 0.00            | 0.00          | 0.00         | 0.00  | 0.00  | 0.00   | 66.86  | 0.00  |
| Mixed Dishes       | Mixed Dishes             | 26.8            | 0.11           | 0.00            | 0.05  | 7.20            | 21.79         | 27.68        | 10.55 | 32.61 | 60.66  | 0.00   | 1.37  |
| Protein Foods      | Eggs                     | 12.9            | 0.00           | 0.00            | 0.00  | 0.00            | 0.02          | 0.00         | 67.95 | 4.34  | 10.57  | 0.00   | 2.22  |
|                    | Nuts, Beans & Soy        | 0.5             | 0.32           | 0.00            | 0.00  | 0.00            | 0.01          | 39.19        | 0.02  | 0.00  | 0.00   | 0.00   | 0.00  |
|                    | Processed Meat           | 6.4             | 0.00           | 0.00            | 0.00  | 0.00            | 0.00          | 0.00         | 0.00  | 47.37 | 0.00   | 0.00   | 0.00  |
|                    | Seafood/Meat             | 2.2             | 0.00           | 0.00            | 0.00  | 0.13            | 0.57          | 0.07         | 0.25  | 15.68 | 0.00   | 0.00   | 0.02  |
| Snacks &<br>Sweets | Candy                    | 0.6             | 1.87           | 0.00            | 0.00  | 0.00            | 0.00          | 4.81         | 0.00  | 0.00  | 0.00   | 0.00   | 0.18  |
|                    | Crackers                 | 0.5             | 0.00           | 0.00            | 0.00  | 2.03            | 0.96          | 2.32         | 0.00  | 0.00  | 0.03   | 0.00   | 0.00  |
|                    | Other Desserts           | 0.3             | 0.06           | 0.00            | 0.00  | 0.00            | 0.02          | 0.00         | 0.02  | 0.00  | 0.00   | 3.96   | 0.07  |
|                    | Savory Snacks            | 0.9             | 0.00           | 0.00            | 0.00  | 2.03            | 1.41          | 0.00         | 0.00  | 0.00  | 0.10   | 0.00   | 0.00  |





**Table S5:** Optimized quantity (grams) and contribution (%) of WWEIA food categories to MyPlate food groups in children optimized diets (relative function)

|               |                       | OPT<br>quantity | Other<br>Fruit | Citrus<br>Fruit | Juice | Whole<br>grains | Ref<br>grains | Soy,<br>nuts | Eggs  | Meat  | Cheese | Yogurt | Milk  |
|---------------|-----------------------|-----------------|----------------|-----------------|-------|-----------------|---------------|--------------|-------|-------|--------|--------|-------|
| Beverages     | Coffee & Tea          | 24.3            | 0.00           | 0.00            | 0.00  | 0.00            | 0.00          | 0.02         | 0.00  | 0.00  | 0.00   | 0.00   | 0.56  |
|               | Diet Beverages        | 2.6             | 0.00           | 0.00            | 0.00  | 0.00            | 0.00          | 0.00         | 0.00  | 0.00  | 0.00   | 0.00   | 0.00  |
|               | Sweetened Beverages   | 55.9            | 1.14           | 4.54            | 13.74 | 0.00            | 0.05          | 1.52         | 0.00  | 0.00  | 0.00   | 29.16  | 0.41  |
| Fats & Oils   | Fats & Oils           | 1.7             | 0.00           | 0.00            | 0.00  | 0.00            | 0.00          | 0.00         | 0.39  | 0.00  | 0.01   | 0.01   | 0.00  |
| Fruit         | Fruit                 | 145.7           | 97.84          | 94.36           | 4.59  | 0.00            | 0.00          | 0.00         | 0.00  | 0.00  | 0.00   | 0.00   | 0.00  |
|               | 100% Juice            | 19.5            | 0.00           | 0.00            | 80.87 | 0.00            | 0.00          | 0.00         | 0.00  | 0.00  | 0.00   | 0.00   | 0.00  |
| Grains        | Breads                | 7.3             | 0.05           | 0.00            | 0.00  | 16.04           | 24.58         | 2.07         | 0.23  | 0.00  | 0.60   | 0.00   | 0.03  |
|               | Cooked grains         | 6.9             | 0.00           | 0.00            | 0.00  | 8.14            | 0.88          | 0.00         | 0.71  | 0.00  | 7.32   | 0.00   | 0.57  |
|               | Grains                | 0.9             | 0.00           | 0.00            | 0.00  | 0.02            | 1.16          | 0.64         | 0.25  | 0.00  | 0.00   | 0.00   | 0.00  |
|               | Quick Breads          | 13.7            | 0.01           | 0.76            | 0.07  | 4.43            | 32.35         | 0.83         | 92.20 | 0.00  | 0.00   | 0.00   | 1.11  |
|               | High Sugar RTE Cereal | 24.2            | 0.57           | 0.02            | 0.00  | 64.08           | 26.60         | 22.55        | 0.00  | 0.00  | 0.00   | 0.00   | 0.09  |
|               | Low Sugar RTE Cereal  | 0.8             | 0.00           | 0.00            | 0.00  | 3.72            | 1.10          | 0.93         | 0.00  | 0.00  | 0.00   | 0.00   | 0.00  |
|               | Cheese                | 0.8             | 0.00           | 0.00            | 0.00  | 0.00            | 0.00          | 0.00         | 0.00  | 0.00  | 91.24  | 0.00   | 0.00  |
| Milk & Dairy  | Flavored Milk         | 9.7             | 0.00           | 0.00            | 0.00  | 0.00            | 0.00          | 0.00         | 0.00  | 0.00  | 0.00   | 0.00   | 2.95  |
|               | Milk                  | 288.0           | 0.00           | 0.00            | 0.00  | 0.00            | 0.00          | 0.00         | 0.00  | 0.00  | 0.00   | 0.00   | 93.84 |
|               | Milk Dessert Drinks   | 0.8             | 0.00           | 0.00            | 0.00  | 0.00            | 0.00          | 0.71         | 0.09  | 0.00  | 0.00   | 0.00   | 0.15  |
|               | Yogurt                | 2.7             | 0.04           | 0.20            | 0.00  | 0.00            | 0.00          | 0.00         | 0.00  | 0.00  | 0.00   | 66.86  | 0.00  |
|               | Mixed Dishes          | Mixed Dishes    | 0              | 0.00            | 0.00  | 0.00            | 0.00          | 0.00         | 0.00  | 0.00  | 0.00   | 0.00   | 0.00  |
| Protein Foods | Eggs                  | 0               | 0.00           | 0.00            | 0.00  | 0.00            | 0.00          | 0.00         | 0.00  | 0.00  | 0.00   | 0.00   | 0.00  |
|               | Nuts, Beans & Soy     | 0.5             | 0.03           | 0.00            | 0.00  | 0.00            | 0.01          | 50.11        | 0.19  | 0.01  | 0.00   | 0.00   | 0.00  |
|               | Processed Meat        | 0               | 0.00           | 0.00            | 0.00  | 0.00            | 0.00          | 0.00         | 0.00  | 0.00  | 0.00   | 0.00   | 0.00  |
|               | Seafood/Meat          | 2.2             | 0.00           | 0.00            | 0.00  | 0.08            | 1.03          | 0.09         | 1.93  | 99.99 | 0.00   | 0.00   | 0.01  |



**Table S6:** Optimized quantity (grams) and contribution (%) of WWEIA food categories to MyPlate food groups in children optimized diets (absolute function)

|                  |                          | OPT<br>quantity | Other<br>Fruit | Citrus<br>Fruit | Juice | Whole<br>grains | Ref<br>grains | Soy,<br>nuts | Eggs  | Meat  | Cheese | Yogurt | Milk  |
|------------------|--------------------------|-----------------|----------------|-----------------|-------|-----------------|---------------|--------------|-------|-------|--------|--------|-------|
| Beverages        | Coffee & Tea             | 24.3            | 0.00           | 0.00            | 0.00  | 0.00            | 0.00          | 0.00         | 0.00  | 0.00  | 0.00   | 0.00   | 0.66  |
|                  | Diet Beverages           | 2.6             | 0.00           | 0.00            | 0.00  | 0.00            | 0.00          | 0.00         | 0.00  | 0.00  | 0.00   | 0.00   | 0.00  |
|                  | Sweetened<br>Beverages   | 55.9            | 1.41           | 5.67            | 13.88 | 0.00            | 0.09          | 0.06         | 0.00  | 0.00  | 0.00   | 29.16  | 0.49  |
| Fats & Oils      | Fats & Oils              | 0               | 0.00           | 0.00            | 0.00  | 0.00            | 0.00          | 0.00         | 0.00  | 0.00  | 0.00   | 0.00   | 0.00  |
| Fruit            | Fruit                    | 116.2           | 96.41          | 93.94           | 3.70  | 0.00            | 0.00          | 0.00         | 0.00  | 0.00  | 0.00   | 0.00   | 0.00  |
|                  | 100% Juice               | 19.5            | 0.00           | 0.00            | 81.68 | 0.00            | 0.00          | 0.00         | 0.00  | 0.00  | 0.00   | 0.00   | 0.00  |
| Grains           | Breads                   | 7.3             | 0.06           | 0.00            | 0.00  | 17.16           | 41.16         | 0.09         | 0.04  | 0.00  | 0.80   | 0.00   | 0.03  |
|                  | Cooked grains            | 6.9             | 0.00           | 0.00            | 0.00  | 8.71            | 1.47          | 0.00         | 0.13  | 0.00  | 9.77   | 0.00   | 0.67  |
|                  | Grains                   | 0.9             | 0.00           | 0.00            | 0.00  | 0.02            | 1.95          | 0.03         | 0.05  | 0.00  | 0.00   | 0.00   | 0.00  |
|                  | Quick Breads             | 0               | 0.00           | 0.00            | 0.00  | 0.00            | 0.00          | 0.00         | 0.00  | 0.00  | 0.00   | 0.00   | 0.00  |
|                  | High Sugar<br>RTE Cereal | 6.4             | 0.19           | 0.01            | 0.00  | 18.09           | 11.75         | 0.25         | 0.00  | 0.00  | 0.00   | 0.00   | 0.03  |
|                  | Low Sugar<br>RTE Cereal  | 11.2            | 0.00           | 0.00            | 0.00  | 52.95           | 24.61         | 0.51         | 0.00  | 0.00  | 0.00   | 0.00   | 0.00  |
|                  | Cheese                   | 0               | 0.00           | 0.00            | 0.00  | 0.00            | 0.00          | 0.00         | 0.00  | 0.00  | 0.00   | 0.00   | 0.00  |
| Milk &<br>Dairy  | Flavored Milk            | 9.7             | 0.00           | 0.00            | 0.00  | 0.00            | 0.00          | 0.00         | 0.00  | 0.00  | 0.00   | 0.00   | 3.47  |
|                  | Milk                     | 243.6           | 0.00           | 0.00            | 0.00  | 0.00            | 0.00          | 0.00         | 0.00  | 0.00  | 0.00   | 0.00   | 93.33 |
|                  | Milk Dessert<br>Drinks   | 0.8             | 0.00           | 0.00            | 0.00  | 0.00            | 0.01          | 0.03         | 0.02  | 0.00  | 0.00   | 0.00   | 0.17  |
|                  | Yogurt                   | 2.7             | 0.05           | 0.25            | 0.00  | 0.00            | 0.00          | 0.00         | 0.00  | 0.00  | 0.00   | 66.87  | 0.00  |
|                  | Mixed<br>Dishes          | Mixed Dishes    | 3.6            | 0.00            | 0.00  | 0.01            | 0.62          | 8.87         | 0.20  | 2.00  | 17.88  | 38.68  | 0.00  |
| Protein<br>Foods | Eggs                     | 12.9            | 0.00           | 0.00            | 0.00  | 0.00            | 0.07          | 0.00         | 95.62 | 17.71 | 50.19  | 0.00   | 0.86  |
|                  | Nuts, Beans & Soy        | 25.0            | 1.60           | 0.00            | 0.00  | 0.00            | 0.74          | 98.14        | 1.60  | 0.40  | 0.00   | 0.00   | 0.00  |
|                  | Processed Meat           | 0               | 0.00           | 0.00            | 0.00  | 0.00            | 0.00          | 0.00         | 0.00  | 0.00  | 0.00   | 0.00   | 0.00  |
|                  | Seafood/Meat             | 2.2             | 0.00           | 0.00            | 0.00  | 0.08            | 1.73          | 0.00         | 0.35  | 64.01 | 0.00   | 0.00   | 0.01  |
